# Supplementary material for: Understanding the Episodic Memory and Executive Functioning Axis Impairment in MCI Patients: A Multicenter Study in Comparison with CSF Biomarkers
Source: MDPI journal article supplement (doi:10.3390/biomedicines11123147), 2023-11-26
Supplement: s1 [file s1]

## Supplementary Material

### S1. Interaction between CSF biomarkers classification, country of origin and the effect in TMS scores

A $\beta$ 42\*country of origin

| Factor       | F-statistic | <i>p-value*</i> | Effect size |
|--------------|-------------|-----------------|-------------|
| TMS 1        | 1.138       | 0.650           | 0.026       |
| TMS 2        | .378        | 0.650           | 0.009       |
| TMS 3        | .004        | 0.953           | 0.000       |
| TMS 4        | .385        | 0.650           | 0.009       |
| TMS 5        | .483        | 0.650           | 0.011       |
| Fluency Test | 5.398       | 0.150           | 0.112       |

t-tau\*country of origin

| Factor       | F-statistic | <i>p-value*</i> | Effect size |
|--------------|-------------|-----------------|-------------|
| TMS 1        | 1.048       | 0.818           | 0.024       |
| TMS 2        | 0.054       | 0.818           | 0.001       |
| TMS 3        | 0.071       | 0.818           | 0.002       |
| TMS 4        | 0.056       | 0.818           | 0.001       |
| TMS 5        | 0.060       | 0.818           | 0.001       |
| Fluency Test | 10.848      | 0.012           | 0.201       |

p-tau\*country of origin

| Factor       | F-statistic | <i>p-value*</i> | Effect size |
|--------------|-------------|-----------------|-------------|
| TMS 1        | .004        | 0.950           | .000        |
| TMS 2        | .281        | 0.950           | .006        |
| TMS 3        | .076        | 0.950           | .002        |
| TMS 4        | .306        | 0.950           | .007        |
| TMS 5        | .011        | 0.950           | .000        |
| Fluency Test | 12.438      | 0.006           | .224        |

Note. Statistical results of the ANCOVA used the country of origin as a covariate. Effect size is reported as partial  $\eta^2$ . F-statistic, F (1, 44).

\**p-value* corrected by FDR at 5%.
